# Supplementary material
Source: MDPI journal article supplement (https://www.mdpi.com/2073-4344/13/1/73)
Supplement: s1 [file s1]

# High-Temperature Cracking of Pentene to Ethylene and Propylene over H-ZSM-5 Zeolites: Effect of Reaction Conditions and Mechanistic Insights

Yueyang Han, Lingyin Du, Yuan Zhu, Youhao Xu \*, Xuhui Bai, Ying Ouyang, Yibin Luo and Xingtian Shu

Research Institute of Petroleum Processing, Sinopec, Beijing 100083, China

**Table S1.** Product yields from pentene cracking over quartz sand under various temperatures

| Reaction Temperature (°C) | methane (wt%) | ethane (wt%) | ethylene (wt%) | Propylene (wt%) | butene (wt%) | hexene (wt%) | heptene (wt%) | total aromatics (wt%) |
|---------------------------|---------------|--------------|----------------|-----------------|--------------|--------------|---------------|-----------------------|
| 500                       | 0.00          | 0.00         | 0.01           | 0.03            | 0.14         | 0.02         | 0.00          | 0.00                  |
| 550                       | 0.02          | 0.03         | 0.03           | 0.06            | 0.21         | 0.02         | 0.00          | 0.00                  |
| 600                       | 0.09          | 0.16         | 0.20           | 0.26            | 0.52         | 0.02         | 0.02          | 0.03                  |
| 650                       | 0.55          | 0.86         | 1.18           | 1.61            | 2.24         | 0.19         | 0.19          | 0.06                  |
| 700                       | 1.34          | 1.89         | 3.75           | 3.86            | 5.43         | 0.60         | 0.48          | 0.45                  |
| 750                       | 2.68          | 3.60         | 9.51           | 10.40           | 6.11         | 1.05         | 0.91          | 1.30                  |
